# Supplementary material for: Evaluating Greenland Surface-Mass-Balance and Firn-Densification Data Using ICESat-2 Altimetry
Source: Copernicus journal article supplement (doi:10.5194/tc-2022-44), 2022-03-08
Supplement: Supplementary file [file tc-2022-44-AC1-supplement.pdf]

## General remarks:

We would like to thank all three referees for their kind words about our manuscript, and for the time that they took to read the manuscript, and to provide us with thoughtful suggestions for how to improve it. Reviewing manuscripts can be one of the most thankless jobs in our field, and it's important to acknowledge how important it is, and how useful it is for an author to get good and thorough reviews on a paper. The recommendations from all three reviewers have helped us clarify some points that were obviously unclear in the initial manuscript, and have led us to clarify for ourselves (and for readers) a couple of scientific points that we had not fully thought through.

In our responses to the referees, we will be writing in blue, sans-serif font, justified to the left. Quotes from the revised text will be in blue, in Times font, indented one stop.

## Referee 1:

Although the ice-dynamic induced height changes (anomalies) can be neglected, how would the variations of local topography/roughness with (fast) ice flows affect the evaluation? This may have little impact for large-scale evaluation when the data are aggregated to a coarse resolution grid, but it would be good if the authors can comment/clarify on this point.

We have added a note to say that our velocity masking largely eliminates the large height-change signals that can be associated with advection of crevasses and rifts in the lower extremities of outlet glaciers.

Correction of firn compaction has been a critical step when using altimetry data to estimate the ice mass changes. RACMO has been more widely used in literature to correct for this effect. Although it may fall out of the scope of this study, it would be very helpful for the community if the authors can comment/discuss the RACMO firn estimates as well.

Adding an evaluation of RACMO to the study at this point would delay its publication more than we would like. We have added this as a suggestion for future research directions in the last paragraph of our conclusions section.

Line 19. Specify the names of the three FD/SMB models evaluated in this study.

Done.

Line 22. Specify the names of the two models mentioned here.

Done.

Line 25. Specify the name of the third model here.

Done.

Line 186. Why did the authors use MARv3.5.2 for this step? How would the difference between MARv3.11.5 and MARv3.5.2 affect the evaluation? The reasons and potential biases should be clarified.

This is simply a matter of the history of when the GSFC models were calculated relative to the history of the MAR model releases. The changes between MARv3.5.2 and MARv3.11.2 were not especially relevant to the surface melt rate in Greenland. We now clarify this just after line 186

“To derive a consistent melt-rate field, we used the MERRA-2 2-m temperatures as input to a degree-day model calibrated to MARv3.5.2 annual melt; the updates between MARv3.5.2 and the MARv3.11.2 model evaluated in this study did not have a major effect on temperature or melt-rate estimates in Greenland, so we assume that the melt-rate calibration for the GSFC models is consistent with MARv3.11.2.”

Section 2.3.1. This part (especially the first two paragraphs) is difficult to follow. Could the authors use some equations to explain the regression analysis done here?

We have split the ‘regression analysis’ section into two shorter sections, one describing the point weighting, the other describing the regression analysis. We now provide a general equation for the regressions, and provide an example of how the regression works for the total model scaling, with a detailed description of the variables in the equation and of how to understand the results of the regression. We hope that the additional description of our thinking and of how model parameters are used in the regression help clarify our thinking and make this part of the study easier to understand.

Section 3.2.3. This part is hard to follow too, with those scaling parameters and standard deviations. It would be helpful if the authors wrote some summary/topic sentences at the beginning of this section.

We have revised the text to put a summary of the most notable result described in each paragraph in the topic sentence, and have revised the body of each paragraph to omit some of the less relevant numerical values

Line 465. “..but the melt for GSFCv1.1 was based on a degree-day parametrization of the MARv3.11.5 melt..”. Here is confusing. Did the authors use MARv3.11.5 or MARv3.5.2 to calibrate the degree-day model? MARv3.5.2 was mentioned in the methods part.

The earlier statement, that the GSFC models are based on MARv3.5.2 melt, is correct. We have amended the sentence at line 465 to read:

The MARv3.11.5 and GSFC models used different FDMs, but the melt for the GSFC models was based on a degree-day parametrization of the MARv3.5.2 melt. We expect GSFCv1.1 to share the MARv3 model's overestimates of height change, but in GSFCv1.2, the positive-degree-day scalings were limited for the high-elevation part of the ice sheet, which results in less total melt in this part of the ice sheet, and makes a notable improvement in the model's performance during times when melt is large.

## Referee 2:

ICESat-2 began measurements in October 2018. MacFerrin et al. recently published a firn compaction dataset, and I believe 2 of the sites have compaction measurements through 2019. It may be outside the scope of this study, but it may be interesting to compare ICESat-2 surface-height changes and modeled surface height changes at these two sites to examine the influence of firn compaction/atmospheric inputs to surface height changes and see how well the models capture these.

Thanks for the suggestion. We have tried comparing ice-surface-height records from weather stations with ICESat-2 and with FDM output, and found that there is noise and/or complexity in the single-point measurements of ice-surface height that made it difficult to compare them directly with other datasets. We think this might be a fruitful avenue to explore for other studies, but that it's beyond the scope of this one. We have added the suggestion to include strain-meter and firn density profiles to our final paragraph as a potential direction for future studies.

I would have liked to see the 3 models introduced earlier. It would be nice to list them in the abstract (e.g. Line 19) and in the introduction (e.g. Line 75).

Done.

It would be nice to clarify why you evaluate MARv3.11.5, but calibrate your degree-day parameterization in the GSFC model using MARv.3.5.2 (Sections 2.2.1 and 2.2.2).

Please see our response to referee 1 about line 186.

The regression analysis sections are quite detailed, and a bit difficult to understand (which may be my own problem). In Section 2.3.1, I did not quite get the point until you gave the example of scaling SMB by 0.5 (Line 254). It may be useful in this section to give a summary how the regressions are used for readers to then understand the more detailed methodology. I believe this would also be useful for Section 3.2.3.

We have moved the sentence where we describe how the expected regression results might relate to errors in the SMB or FD models to the start of the section, and have added some more discussion of different types of regression results. The start of section 3.2.2 (previously 3.2.1) now reads:

To help describe the relationship between modelled and measured height-change estimates, we calculate weighted regressions using components of the models' height changes as independent variables. Our goal in these regressions is to identify how the modelled height changes differ from the measurements over the ice sheet. These regressions estimate the scaling(s) for the model parameters that minimize the variance between the measured height differences and the sum of the scaled model parameters:

$$R_{model} = \sum \mathbf{W} \left( \mathbf{dh} - \left( dh_0 + \sum_{\text{parameter } j} S_j \mathbf{dP}_j \right) \right)^2 \quad 1$$

Here  $\mathbf{W}$  are the point-density-based weights from 2.3.1,  $\mathbf{dh}$  are the measured height changes,  $\mathbf{dP}_j$  are differences in model parameters interpolated to the locations and times for the measurements that make up each height-change measurement,  $S_j$  are the scaling values for each parameter, and  $dh_0$  is the mean residual height change. The main statistic we use to evaluate the goodness of fit is the weighted standard deviation, calculated as:

$$\sigma = \left[ \frac{\sum r_i^2 W_i}{\sum W_i} \right]^{1/2} \quad 2$$

Here  $W_i$  are the inverse point densities, and  $r_i$  are the regression residuals. As an example, in a regression between the total model height change and the observed height change (section 3.2.1) we solve for the coefficient,  $A$ , and the mean residual height change,  $dh_0$ , that minimize the quantity:

$$R_{model} = \sum \mathbf{W} (\mathbf{dh} - (dh_0 + A \mathbf{dh}_m))^2 \quad 3$$

Here  $\mathbf{dh}_m$  are the modelled height changes. Hypothetically, if one of the models were to systematically overestimate the surface mass balance by a factor of two, we would expect to see a regression for SMB result in a coefficient of 0.5 (meaning that scaling the SMB by 0.5 causes the model to fit the data), and residuals to that regression approximately equal to the data errors. Conversely, if the modelled height change was not strongly correlated with the measured height changes, we expect to see an arbitrary values for the regression coefficient, and to see a residual variance only slightly smaller than the data variance. Our analysis of the variance statistics is somewhat qualitative because we do not have a convincing way to determine the number of independent parameters in our regressions, but, as will be seen later in this paper, the distinction between variables for which regressions reduce the variance and those for which they do not is fairly clear.

Lines 282-284: Can you make this sentence clearer? You say “we can see that melt was considerably stronger in 2019 than it was in 2020”. Can you specify where in the table we look to come to that conclusion? It is difficult to find in the table by keeping track of the variables.

Sorry for the confusion. We have added a note to the end of this sentence:

(compare the  $f_{\text{melt}}$  statistics for sp-su 2019 with those from sp-su 2020).

Lines 466 and 517: Here you say that melt for GSFCv1.1 was based on degree-day parameterization of the MARv3.11.5 melt. Earlier in the methods section you mentioned that it used MARv3.2.5. Could you clarify this?

Please see the response to referee 1’s comment on line 465. We also note at line 517 that the MAR version used in the calibration was 3.5.2

Line 500: What about using these models to predict ice sheet mass changes in the future using these SMB/FD models? It seems important that these models overpredict FAC changes associated with high-elevation melt events, which will likely be more frequent in the future.

This is a good point. We have added the following to the end of the next paragraph (in which we discuss evidence for SMB errors in the models):

At the same time, the most significant deficiency that we infer in MARv3.11.5 and GSFCv1.1 was in the estimation of melt rates in the interior of the ice sheet, where meltwater is absorbed by the firn, and makes no contribution to runoff. If the same problem were to be present in models used to predict ice-sheet SMB in the future, when the climate is warmer and runoff is more prevalent in the ice-sheet interior, we would expect them to predict excessively negative SMB rates.

Figures 4, 6, 7: Could you write out what each colored histogram represents in the figure caption? That would have benefited me while reading.

We have added the curve descriptions to the captions.

MacFerrin et al. citation:

MacFerrin, M. J., Stevens, C. M., Vandecrux, B., Waddington, E. D., and Abdalati, W.: The Greenland Firn Compaction Verification and Reconnaissance (FirnCover) dataset,

2013–2019, Earth Syst. Sci. Data, 14, 955–971, <https://doi.org/10.5194/essd-14-955-2022>, 2022.

We now cite this paper in our conclusions section, as part of our recommendation for further work.

### Referee 3:

Smith et al. take up the challenge to assess the performance of combined SMB-FD models against laser-derived observations of elevation change over parts of the Greenland ice sheet where they assume ice-dynamical effects to be negligible. This is important, as it allows us to understand how to improve altimetry-based estimated of GrIS mass balance using firm and SMB models.

The paper is clearly written (in most places), and the scientific analyses are sound (in most places).

My only major critique of this paper is that the analysis of the dh correction, as well as the scaling experiments in section 3.2, are only presented in terms of histograms over the entire ice sheet, or over aggregated sections of the ice sheet.

Much more insight would be provided to the reader if time series were presented from a selection of locations across the ice sheet. What do time series of dh, dhm, dhc, dhFAC and dhSMB look like for an individual location in, for example, the lower western accumulation area, the southern interior, the northern interior, the northeast and the southeast? Rather than having to guess the physical reasons for improved agreement (reduced residuals), it would become clear at a process level from the time series.

As this is my only major concern, I encourage the authors to expand the paper to accommodate for it. It would strengthen further the discussion about the scaling experiments, because the authors will have figures with time series of dhFAC and dhSMB that immediately make obvious why scaling of dhFAC works and that of dhSMB won't.

We will include a figure that shows measured and modeled height changes for three locations that should be representative of the kinds of conditions we see around the ice sheet. We were initially optimistic that these plots would be a simple way of illustrating the processes at work in the SFM/SMB evolution, but the data did not cooperate especially well. Presenting the data as histograms and as thumbnail-sized maps of Greenland collapses a lot of small-scale variability in the models and in the data into figures that don't show the details of the process, but do illustrate the ice-sheet-scale statistics of the data and the models that we hope to explain in the paper. When we select data and model results from small areas of the ice sheet, the local variability in the model and the irregular sampling of the ATL11 data can produce plots that do not obviously tell the same story as do the aggregate statistics of the data over large areas. Since the plots that we made take up

most of a page, it does not seem like a good use of journal space to include a lot of plots like this; instead, we discuss the general properties of the plots, and state that they are intended not as a representative sample of the data, but rather as an illustration of the small-scale structure of the measurements and models.

Line by line comments:

L 29: heights vary -> elevation varies

We understand the referee's discomfort with the use of "height" to describe the vertical location of the ice-sheet surface, when the broader community tends to use "elevation." This is a cultural quirk of the ICESat-2 community, which we hope all three referees can learn to forgive.

L 38: perhaps good to clarify that you are referring to a climatologically mean surface mass balance here

We added the words 'climatologically mean.'

L 51: This is a confusing statement. FD models are forced by meteorological parameters as well as by mass fluxes, both of which are computed by an SMB model.

We revised this sentence to say:

FD models are driven by information about heat and moisture flux variability provided by SMB models,

L 68: Here you focus mostly on the densification part of an FD. However, the thermodynamical part of FD models is usually also evaluated against observations of deep temperature.

We now specify that it is the densification that is being tested in the studies we cite.

L 71: In Munneke et al. (2015), laser-observed  $dh/dt$  was tested against an FD model at selected locations in order to evaluate their model.

We added a reference to the Munneke study:

We have identified one study [*Verjans et al.*, 2021] that has used altimetry differences to validate combined SMB and FD models in Antarctica, and a second [*Munneke et al.*, 2015] that used altimetry differences to evaluate trends in snow-surface heights predicted by models in Greenland.

L 93: I assume that the separation of 3.3 km refers to the ground projection of the lasers, not of the lasers themselves

The referee is correct. Instrument designs that included a 6.6-km wide spacecraft were deemed too expensive. We have edited the sentence to indicate that the measurements are separated by 3.3 km, not the lasers

L 105: please reformulate: a strategy does not measure anything.

(also for the next comment): We have deleted this paragraph, which was redundant to material in the next paragraph.

L 105: "At each of a set of reference points..." this sentence does not flow well

L 129: Why is it safe to assume that the errors derived from release-003 products are not too optimistic?

The study by Magruder et al., 2020, found that the actual geolocation errors on the product were better than 6.5 m, and that the nominal errors reported on the products (which were mostly meant to indicate that the errors had not been rigorously assessed at the time that the product was generated) were too large. In any case, our statement in the text was too complicated, and we replaced it with this:

However, because release-004 along-track products use nominal, pessimistic estimates of the geolocation errors (20 m in each direction), and studies that assessed the accuracy of release-003 products found that they in fact had smaller geolocation errors, generally less than 6.5 m [Magruder et al., 2020], we expect to see correlated errors ranging from a few cm in the interior to ~0.65 m in the most strongly (~10%) sloping areas near the coasts.

Table 1: Listing the internal model variables feels redundant since they are never referred to in the manuscript. This table can either be moved to the supplementary materials or removed entirely.

This is a reasonable suggestion. We will move table 1 to the supplementary material.

L 220: In 2008, Helsen et al. showed that systematic surface elevation change can be the delayed result of multi-decadal or even centennial variability in SMB. In the present setup of your study, this effect is not accounted for. Rather, like in other studies, changes are defined with respect to a reference period (in your case, 1980-1995) over which no change is assumed. However, in the interior over which you evaluate the SMB/FD models, any residual between observations and models could be caused by these very long-term effects originating from quite deep in the firm.

We agree with this statement, and have added the following text to the methods section:

Although the spin-up of the FD model and our assumption of zero change during the reference period may result in errors in the detrended FD model results (e.g. [Helsen et al., 2008]), we expect these errors to result primarily errors in the modelled height change that are steady over long (decadal) periods of time. The quarter-annual height changes that are the main focus of this study may experience a temporally uniform shift (i.e. might all be too positive or too negative at a



particular location) as a result of these errors, but we do not expect the temporal variability of height changes to be significantly affected.

And have added the following text to the discussion section:

The analysis in this study has focused on the variability of surface height at quarter-annual time scales. Any long-term differences between the modeled SMB/FD and the combined SMB, FD, and ice-flux divergence in the ice sheet will appear in our results as a non-zero mean residuals, caused by the regional mean of the differences, and as extra spread in the residuals, caused by spatial variability in the differences. Without additional information about the state of the ice sheet, we cannot distinguish the extent to which FD model errors (e.g. [Helsen *et al.*, 2008]), SMB-model errors, and errors in our assumption that the ice-sheet was in balance between 1980 and 1995 contribute the means and spreads in the residuals we measure. Despite this, the spread of the residuals to the best-fitting regressions (e.g. Fig. 6) bounds the spatial variability in any of these errors to ~decimeter scales or better in the ice-sheet interior, and to few-decimeter scales for elevations less than 2 km

L 305 (figure 2): see major issue above. The 32 tiled maps are a very comprehensive way of presenting the data, but it lacks in detail, making it hard to judge the models against observations at key locations. My suggestion would be to add a figure with time series of dh, dhm and dhc for a few selected locations (e.g. west coast, southern interior, northern interior, NE coast, SE coast). In that way, it becomes much easier to appreciate the temporal simulation of elevation change by the models compared to the observations.

Please see our response to Referee 3's fourth paragraph. We will add a figure demonstrating time series of model variables, height changes, and corrected height changes for three different locations on the ice sheet. We feel that these plots are useful to provide context to the aggregated height-change maps and histograms, it is hard to capture a representative sample of how the models and data behave in plots of this type, and that the large-scale summary graphics are still the best way to illustrate what this study has learned about ice-sheet processes. We hope that presenting both kinds of plots accomplishes what the referee was hoping for.

L 330 (figure 4): perhaps clarify here that the scaling factors X were defined such that  $dh - X dhm == 0$

We have added notes to the *regression experiments* section to clarify how the regression parameters were calculated, and how the mean residuals and standard deviations were derived, which we hope satisfies this question.

L 345: what does the scaling imply? Is surface density not sufficiently captured? Is there a structural overestimation of snowfall and/or melt? Is there a structural error in the ICESat observations?

Line 345 is in the results section, so we do not provide much interpretation of the data. The discussion section includes answers to these questions. Our understanding (as explained in the results section) is that MARv3.11.5 and GSFCv1.1 systematically overestimate melt for high-elevation, white-snow conditions, a problem that is corrected in GSFCv1.2

L 425 (figure 7): the effect of only scaling  $dh_{FAC}$  (light green line) is invisible in the graph.

We have added a note to explain this:

**Note that in each of these plots, the histogram for the separate rescaling of  $dh_{FAC}$  and  $dh_{SMB}$  is nearly identical to that for rescaling of  $dh_{FAC}$  alone, so the histograms for  $dh_{FAC}$  are not separately visible.**

L 425 (figure): why does rescaling the  $dh_{SMB}$  make almost no difference, as opposed to rescaling  $dh_{FAC}$ ? Please elaborate on this.

This is an important point to capture, and we have added a comment explaining this to the discussion section:

In both MARv3.11.5 and the GSFC models, runoff is small over most of the ice sheet. This means that the SMB component of detrended height change is approximately equal to positive contributions equal to the ice-equivalent snowfall, and negative contributions equal to the long-term average SMB rate that we subtracted to detrend the SMB. This component has relatively small temporal variability, and cannot explain much of the variance in the height-change rate.

L 456: why does it help to isolate errors in high-elevation melt when the agreement at lower elevations is good? Can we simply assume that an SMB model will perform well at higher elevations (snow albedo dominated) when it does so at lower elevations (ice albedo dominated)?

We have deleted this sentence, whose purpose was somewhat unclear.

L 471: The elevation change in GSFCv1.2 is much less sensitive to melt events than the other two models. At the same time, its surface density has increased to 327-387 kg/m<sup>3</sup>, which is higher than the mean 315 kg/m<sup>3</sup> reported by Fausto et al. in 2018. The surface elevation change associated with a melt event is approximately the amount of melt per unit area divided by the density of the melted snow: Why do you think the higher surface density cannot explain the lower sensitivity of GSFCv1.2 to melt events?

GSFCv1.2 is only less sensitive to melt events in the high-elevation part of the ice sheet. As it turns out, GSFCv1.2 is actually slightly less dense than v1.1 at high elevations, so the only available explanation is that the melt intensity is too high in v1.1. We have added a note to section 2.2.2 about the spatial distribution of density differences, and a note to the discussion section:

Changes between GSFCv1.1 and GSFCv1.2 also include a different calculation of the initial surface density, which likely increased the sensitivity of GSFCv1.2 surface height to melt events slightly in the high-elevation interior of the ice sheet, and decreased it at low elevations. The improved model performance in regions where GSFCv1.2 was likely more sensitive to melt events than GSFCv1.1 points again to better representation of melt in GSFCv1.2 as the major improvement between the GSFC models.

L 514: GFSCv1.1 and GFSCv1.1 -> GFSCv1.1 and GFSCv1.2

Fixed.
